# Supplementary material for: Analysis of Fecal Microbial Changes in Young Calves Following Bovine Rotavirus Infection
Source: MDPI journal article supplement (doi:10.3390/vetsci10080496), 2023-08-01
Supplement: s1 [file s1]

**Table S1** qRT-PCR results for bovine rotavirus detection in individual calve feces

| Animal no. | Day – 3               |     | Day + 1  |     | Day + 7  |     |
|------------|-----------------------|-----|----------|-----|----------|-----|
|            | <sup>1</sup> Ct value | P/N | Ct value | P/N | Ct value | P/N |
| Healthy 1  | > 35                  | -   | > 35     | -   | > 35     | -   |
| Healthy 2  | > 35                  | -   | > 35     | -   | > 35     | -   |
| Healthy 3  | > 35                  | -   | > 35     | -   | > 35     | -   |
| Rota 1     | > 35                  | -   | 26.9     | +   | 29.3     | +   |
| Rota 2     | > 35                  | -   | 32.2     | +   | 34.9     | +   |
| Rota 3     | > 35                  | -   | 24.9     | +   | 25.1     | +   |

Day – 3, 3 days before rotavirus inoculation; Day + 1, 1 day post-inoculation; Day + 7, 7 days post-inoculation.

Healthy: non-diarrhea.

Rota: calves inoculated with rotavirus to induce diarrhea.

<sup>1</sup>Ct value >35 is negative.

**Table S2** Individual calves fecal consistency scores in Healthy and Rota groups

| Animal no. | Day – 3 | Day + 1 | Day + 7 |
|------------|---------|---------|---------|
| Healthy 1  | 0       | 1       | 1       |
| Healthy 2  | 1       | 1       | 1       |
| Healthy 3  | 0       | 1       | 1       |
| Rota 1     | 1       | 2       | 2       |
| Rota 2     | 1       | 2       | 3       |
| Rota 3     | 1       | 3       | 3       |

Day – 3, 3 days before rotavirus inoculation; Day + 1, 1 day post-inoculation; Day + 7, 7 days post-inoculation.

Healthy: non-diarrhea.

Rota: calves inoculated with rotavirus to induce diarrhea.

**Table S3.** Relative abundance ( $\geq 0.1\%$ ) of fecal bacterial phyla, families, and genera between Healthy and Rota groups three days before inoculation

| Measurements                       | Relative abundance (%) |      | SEM  | <i>p</i> Value |
|------------------------------------|------------------------|------|------|----------------|
|                                    | Healthy                | Rota |      |                |
| Day – 3 Phyla                      |                        |      |      |                |
| Firmicutes                         | 62.1                   | 60.8 | 7.21 | 0.906          |
| Bacteroidota                       | 28.5                   | 22.3 | 6.04 | 1.000          |
| Proteobacteria                     | 6.05                   | 12.7 | 4.04 | 0.663          |
| Actinobacteriota                   | 2.02                   | 3.27 | 1.43 | 0.591          |
| Verrucomicrobiota                  | 0.73                   | 0.92 | 0.42 | 0.663          |
| Fusobacteriota                     | 0.34                   | 0.01 | 0.17 | 1.000          |
| Desulfobacterota                   | 0.19                   | 0.01 | 0.09 | 0.354          |
| Day – 3 Families                   |                        |      |      |                |
| Lactobacillaceae                   | 21.1                   | 25.9 | 11.5 | 0.789          |
| Bacteroidaceae                     | 22.6                   | 21.2 | 7.71 | 0.909          |
| Lachnospiraceae                    | 11.3                   | 15.2 | 4.94 | 0.641          |
| Enterobacteriaceae                 | 5.13                   | 8.48 | 3.99 | 0.586          |
| Butyricicoccaceae                  | 2.67                   | 5.72 | 1.86 | 0.328          |
| Coriobacteriaceae                  | 1.51                   | 3.05 | 1.48 | 0.516          |
| Pasteurellaceae                    | 0.81                   | 2.92 | 1.84 | 0.663          |
| Enterococcaceae                    | 0.93                   | 2.89 | 1.45 | 0.420          |
| Tannerellaceae                     | 0.97                   | 1.17 | 0.80 | 0.878          |
| Erysipelatoclostridiaceae          | 0.60                   | 1.11 | 0.45 | 0.470          |
| Akkermansiaceae                    | 0.72                   | 0.92 | 0.42 | 0.756          |
| Acidaminococcaceae                 | 1.36                   | 0.76 | 0.51 | 0.465          |
| Ruminococcaceae                    | 18.9                   | 0.55 | 7.88 | <b>0.081</b>   |
| Erysipelotrichaceae                | 1.14                   | 0.15 | 0.59 | 0.663          |
| Clostridiaceae                     | 0.01                   | 0.12 | 0.04 | 0.354          |
| Oscillospiraceae                   | 0.27                   | 0.01 | 0.01 | <b>0.077</b>   |
| Rikenellaceae                      | 0.16                   | 0.00 | 0.05 | <b>0.077</b>   |
| Others                             | 9.85                   | 9.96 | 6.57 | 1.000          |
| Day – 3 Genera                     |                        |      |      |                |
| <i>Lactobacillus</i>               | 16.5                   | 22.0 | 10.5 | 0.731          |
| <i>Bacteroides</i>                 | 22.6                   | 21.2 | 7.71 | 0.909          |
| <i>Escherichia-Shigella</i>        | 5.13                   | 8.48 | 3.99 | 0.586          |
| <i>Tyzzarella</i>                  | 3.22                   | 6.62 | 2.95 | 0.463          |
| <i>Butyricoccus</i>                | 2.67                   | 5.72 | 1.86 | 0.328          |
| <i>[Ruminococcus] gnavus group</i> | 1.84                   | 4.69 | 2.20 | 0.454          |
| <i>Limosilactobacillus</i>         | 4.62                   | 3.85 | 2.18 | 0.819          |
| <i>Collinsella</i>                 | 1.51                   | 3.05 | 1.48 | 0.516          |
| <i>Gallibacterium</i>              | 0.81                   | 2.92 | 1.84 | 0.663          |

|                                     |      |      |      |              |
|-------------------------------------|------|------|------|--------------|
| <i>Enterococcus</i>                 | 0.93 | 2.89 | 1.45 | 0.420        |
| <i>UG Lachnospiraceae</i>           | 0.90 | 2.23 | 1.43 | 1.000        |
| <i>Parabacteroides</i>              | 0.97 | 1.17 | 0.80 | 0.878        |
| <i>Erysipelatoclostridium</i>       | 0.60 | 1.11 | 0.45 | 0.470        |
| <i>Akkermansia</i>                  | 0.72 | 0.92 | 0.42 | 0.756        |
| <i>Dorea</i>                        | 0.82 | 0.91 | 0.61 | 0.930        |
| <i>Phascolarctobacterium</i>        | 1.36 | 0.76 | 0.51 | 0.465        |
| <i>Lachnoclostridium</i>            | 0.26 | 0.41 | 0.19 | 0.630        |
| <i>Faecalibacterium</i>             | 7.24 | 0.39 | 2.98 | <b>0.081</b> |
| <i>Blautia</i>                      | 2.83 | 0.26 | 0.81 | 0.190        |
| <i>Faecalicoccus</i>                | 1.14 | 0.15 | 0.59 | 0.663        |
| <i>Clostridium sensu stricto 2</i>  | 0.01 | 0.12 | 0.04 | 0.354        |
| <i>Subdoligranulum</i>              | 11.1 | 0.11 | 5.09 | <b>0.077</b> |
| <i>Fournierella</i>                 | 0.58 | 0.05 | 0.26 | 0.383        |
| <i>[Ruminococcus] torques group</i> | 1.42 | 0.04 | 0.62 | 0.507        |
| <i>Pseudoflavonifractor</i>         | 0.27 | 0.01 | 0.01 | <b>0.077</b> |
| <i>Alistipes</i>                    | 0.16 | 0.00 | 0.05 | <b>0.077</b> |
| <i>Others</i>                       | 9.85 | 9.96 | 6.57 | 1.000        |

---

Day – 3, 3 days before rotavirus inoculation; Day + 1, 1 day post-inoculation; Day + 7, 7 days post-inoculation.

Healthy: non-diarrhea.

Rota: calves inoculated with rotavirus to induce diarrhea.

SEM: standard error of the mean.

UG: unclassified genus

**Table S4.** Relative abundance ( $\geq 0.1\%$ ) of fecal bacterial phyla, families, and genera between Healthy and Rota groups post-inoculation day 1

| Measurements               | Relative abundance (%) |       | SEM   | <i>p</i> Value |
|----------------------------|------------------------|-------|-------|----------------|
|                            | Healthy                | Rota  |       |                |
| Day + 1 Phyla              |                        |       |       |                |
| Firmicutes                 | 62.2                   | 67.4  | 13.9  | 0.823          |
| Verrucomicrobiota          | 6.11                   | 11.4  | 7.07  | 1.000          |
| Proteobacteria             | 10.2                   | 9.92  | 7.65  | 0.663          |
| Bacteroidota               | 10.3                   | 5.13  | 4.19  | 0.437          |
| Fusobacteriota             | 0.13                   | 4.69  | 2.38  | 1.000          |
| Actinobacteriota           | 10.5                   | 1.23  | 2.28  | <b>0.064</b>   |
| Desulfobacterota           | 0.00                   | 0.23  | 0.12  | 1.000          |
| Campylobacterota           | 0.48                   | 0.00  | 0.24  | 1.000          |
| Synergistota               | 0.07                   | 0.00  | 0.03  | 0.505          |
| Day + 1 Families           |                        |       |       |                |
| Streptococcaceae           | 10.2                   | 39.9  | 11.3  | 0.151          |
| Lactobacillaceae           | 1.47                   | 20.05 | 10.5  | 0.383          |
| Akkermansiaceae            | 2.67                   | 11.4  | 6.90  | 0.825          |
| Enterobacteriaceae         | 8.50                   | 7.44  | 6.61  | 0.663          |
| Fusobacteriaceae           | 0.13                   | 4.69  | 2.38  | 1.000          |
| Bacteroidaceae             | 7.63                   | 4.56  | 4.46  | 0.652          |
| Enterococcaceae            | 7.38                   | 2.11  | 2.58  | 0.256          |
| Clostridiaceae             | 12.0                   | 1.84  | 3.94  | 0.383          |
| Pasteurellaceae            | 0.62                   | 1.58  | 1.05  | 0.663          |
| Lachnospiraceae            | 3.60                   | 0.33  | 1.27  | 0.383          |
| Tannerellaceae             | 1.36                   | 0.33  | 0.76  | 0.643          |
| Acidaminococcaceae         | 0.22                   | 0.29  | 0.21  | 0.839          |
| Peptostreptococcaceae      | 0.01                   | 0.26  | 0.11  | 0.354          |
| Coriobacteriaceae          | 1.86                   | 0.11  | 0.83  | 0.184          |
| Erysipelatoclostridiaceae  | 0.51                   | 0.10  | 0.20  | 0.383          |
| Bifidobacteriaceae         | 8.53                   | 0.03  | 2.42  | 0.190          |
| Ruminococcaceae            | 7.03                   | 0.00  | 2.85  | 0.184          |
| Butyricicoccaceae          | 5.07                   | 0.00  | 2.06  | <b>0.077</b>   |
| Chlamydiaceae              | 3.43                   | 0.00  | 1.67  | 0.197          |
| Prevotellaceae             | 0.98                   | 0.00  | 0.34  | <b>0.064</b>   |
| Others                     | 16.8                   | 4.92  | 5.60  | 0.190          |
| Day + 1 Genera             |                        |       |       |                |
| <i>Streptococcus</i>       | 10.2                   | 39.9  | 11.29 | 0.151          |
| <i>Limosilactobacillus</i> | 0.85                   | 11.46 | 6.04  | 0.383          |
| <i>Akkermansia</i>         | 2.67                   | 11.41 | 6.90  | 0.825          |
| <i>Ligilactobacillus</i>   | 0.62                   | 8.59  | 4.47  | 0.383          |

|                                    |       |      |      |              |
|------------------------------------|-------|------|------|--------------|
| <i>Escherichia-Shigella</i>        | 8.50  | 7.44 | 6.61 | 0.663        |
| <i>Fusobacterium</i>               | 0.13  | 4.69 | 2.38 | 1.000        |
| <i>Bacteroides</i>                 | 7.63  | 4.56 | 4.46 | 0.652        |
| <i>Enterococcus</i>                | 7.38  | 2.11 | 2.58 | 0.256        |
| <i>Clostridium sensu stricto 1</i> | 11.86 | 1.73 | 3.91 | 0.383        |
| <i>Gallibacterium</i>              | 0.62  | 1.58 | 1.05 | 0.663        |
| <i>Parabacteroides</i>             | 1.36  | 0.33 | 0.76 | 0.643        |
| <i>Phascolarctobacterium</i>       | 0.22  | 0.29 | 0.21 | 0.839        |
| <i>Peptostreptococcus</i>          | 0.01  | 0.26 | 0.11 | 0.354        |
| <i>Blautia</i>                     | 0.47  | 0.19 | 0.26 | 1.000        |
| <i>[Ruminococcus] gnavus group</i> | 3.06  | 0.13 | 1.05 | 0.184        |
| <i>Clostridium sensu stricto 2</i> | 0.10  | 0.11 | 0.05 | 0.663        |
| <i>Collinsella</i>                 | 1.86  | 0.11 | 0.83 | 0.184        |
| <i>Erysipelatoclostridium</i>      | 0.51  | 0.10 | 0.20 | 0.383        |
| <i>Bifidobacterium</i>             | 8.53  | 0.03 | 2.42 | 0.190        |
| <i>Ruminococcus</i>                | 0.21  | 0.00 | 0.05 | 0.184        |
| <i>Butyricicoccus</i>              | 5.07  | 0.00 | 2.06 | <b>0.077</b> |
| <i>Chlamydia</i>                   | 3.43  | 0.00 | 1.67 | 0.197        |
| <i>Fournierella</i>                | 0.86  | 0.00 | 0.26 | 0.197        |
| <i>Faecalibacterium</i>            | 5.95  | 0.00 | 2.80 | 0.197        |
| <i>Alloprevotella</i>              | 0.98  | 0.00 | 0.34 | <b>0.064</b> |
| <i>Others</i>                      | 16.9  | 4.93 | 5.59 | 0.190        |

---

Day – 3, 3 days before rotavirus inoculation; Day + 1, 1 day post-inoculation; Day + 7, 7 days post-inoculation.

Healthy: non-diarrhea.

Rota: calves inoculated with rotavirus to induce diarrhea.

SEM: standard error of the mean.

**Table S5.** Relative abundance ( $\geq 0.1\%$ ) of fecal bacterial phyla, families, and genera between Healthy and Rota groups post-inoculation day 7

| Measurements                       | Relative abundance (%) |       | SEM  | <i>p</i> Value |
|------------------------------------|------------------------|-------|------|----------------|
|                                    | Healthy                | Rota  |      |                |
| Day + 7 Phyla                      |                        |       |      |                |
| Firmicutes                         | 74.29                  | 78.73 | 6.28 | 1.000          |
| Actinobacteriota                   | 25.33                  | 12.70 | 6.45 | 0.280          |
| Bacteroidota                       | 0.12                   | 3.35  | 1.56 | 0.507          |
| Verrucomicrobiota                  | 0.01                   | 2.93  | 1.47 | 1.000          |
| Proteobacteria                     | 0.19                   | 2.06  | 0.87 | 0.663          |
| Fusobacteriota                     | 0.01                   | 0.21  | 0.11 | 1.000          |
| Euryarchaeota                      | 0.04                   | 0.01  | 0.03 | 1.000          |
| Day + 7 Families                   |                        |       |      |                |
| Lachnospiraceae                    | 49.1                   | 44.3  | 18.1 | 0.862          |
| Streptococcaceae                   | 9.94                   | 14.03 | 5.83 | 0.650          |
| Bifidobacteriaceae                 | 23.9                   | 11.8  | 6.90 | 0.307          |
| Enterococcaceae                    | 0.43                   | 8.16  | 2.22 | 0.081          |
| Clostridiaceae                     | 2.23                   | 4.03  | 2.73 | 1.000          |
| Enterobacteriaceae                 | 0.15                   | 1.07  | 0.45 | 0.663          |
| Erysipelatoclostridiaceae          | 3.02                   | 0.43  | 1.23 | 0.383          |
| Coriobacteriaceae                  | 0.81                   | 0.37  | 0.41 | 1.000          |
| Erysipelotrichaceae                | 0.11                   | 0.37  | 0.19 | 0.825          |
| Eubacteriaceae                     | 0.08                   | 0.17  | 0.07 | 0.418          |
| Eggerthellaceae                    | 0.04                   | 0.16  | 0.07 | 0.349          |
| Erysipelotrichaceae                | 0.07                   | 0.09  | 0.06 | 0.849          |
| Veillonellaceae                    | 0.11                   | 0.01  | 0.03 | 0.354          |
| Others                             | 9.95                   | 15.0  | 11.1 | 1.000          |
| Day + 7 Genera                     |                        |       |      |                |
| <i>Limosilactobacillus</i>         | 37.7                   | 19.9  | 13.7 | 0.424          |
| <i>Streptococcus</i>               | 9.94                   | 14.0  | 5.83 | 0.650          |
| <i>Lactobacillus</i>               | 4.62                   | 12.3  | 4.98 | 0.375          |
| <i>Ligilactobacillus</i>           | 6.46                   | 11.91 | 5.19 | 0.508          |
| <i>Bifidobacterium</i>             | 23.9                   | 11.8  | 6.90 | 0.663          |
| <i>Enterococcus</i>                | 0.43                   | 8.16  | 2.22 | <b>0.081</b>   |
| <i>Clostridium sensu stricto 1</i> | 2.23                   | 4.03  | 2.73 | 1.000          |
| <i>Escherichia-Shigella</i>        | 0.15                   | 1.07  | 0.45 | 0.663          |
| <i>Collinsella</i>                 | 0.81                   | 0.37  | 0.41 | 1.000          |
| <i>Turicibacter</i>                | 0.04                   | 0.28  | 0.16 | 1.000          |
| <i>Sharpea</i>                     | 2.95                   | 0.26  | 1.15 | 0.190          |
| <i>Eubacterium</i>                 | 0.08                   | 0.17  | 0.07 | 0.418          |
| <i>Erysipelatoclostridium</i>      | 0.07                   | 0.17  | 0.09 | 0.469          |

|                        |      |      |      |       |
|------------------------|------|------|------|-------|
| <i>Paraeggerthella</i> | 0.04 | 0.16 | 0.07 | 0.354 |
| <i>Acetitomaculum</i>  | 0.34 | 0.10 | 0.19 | 0.825 |
| <i>Megasphaera</i>     | 0.11 | 0.01 | 0.03 | 0.354 |
| Others                 | 10.1 | 15.2 | 11.2 | 1.000 |

---

Day – 3, 3 days before rotavirus inoculation; Day + 1, 1 day post-inoculation; Day + 7, 7 days post-inoculation.

Healthy: non-diarrhea.

Rota: calves inoculated with rotavirus to induce diarrhea.

SEM: standard error of the mean.

**Table S6.** Predicted KEGG hierarchies (orthologs, modules, and pathways) between Healthy and Rota groups

| Measurements   | Relative abundance (%) |      | SEM  | <i>p</i> Value |
|----------------|------------------------|------|------|----------------|
|                | Healthy                | Rota |      |                |
| Day – 3        |                        |      |      |                |
| KEGG orthologs | 4987                   | 4647 | 181  | 0.274          |
| KEGG pathways  | 127                    | 126  | 8.21 | 0.191          |
| KEGG modules   | 243                    | 250  | 5.49 | 0.258          |
| Day + 1        |                        |      |      |                |
| KEGG orthologs | 4897                   | 5065 | 253  | 0.713          |
| KEGG pathways  | 136                    | 139  | 7.01 | 0.783          |
| KEGG modules   | 140                    | 126  | 5.44 | 0.497          |
| Day + 7        |                        |      |      |                |
| KEGG orthologs | 4633                   | 4371 | 525  | 0.759          |
| KEGG pathways  | 246                    | 234  | 6.26 | 0.957          |
| KEGG modules   | 232                    | 228  | 13.6 | 0.874          |

Day – 3, 3 days before rotavirus inoculation; Day + 1, 1 day post-inoculation; Day + 7, 7 days post-inoculation.

Healthy: non-diarrhea.

Rota: calves inoculated with rotavirus to induce diarrhea.

SEM: standard error of the mean.

KEGG: Kyoto Encyclopedia of Genes and Genomes.

**Table S7.** Differentially abundant KEGG modules between Healthy and Rota groups, which were detected using LEfSe with an LDA effect size > 2.

| KEGG modules | Dominance | Treatment |      | SEM  | LDA   | p Value | Description                                                                               |
|--------------|-----------|-----------|------|------|-------|---------|-------------------------------------------------------------------------------------------|
|              |           | Healthy   | Rota |      |       |         |                                                                                           |
| Day – 3      |           |           |      |      |       |         |                                                                                           |
| M00176       | Healthy   | 0.24      | 0.12 | 0.03 | 3.003 | 0.050   | Assimilatory sulfate reduction, sulfate => H2S                                            |
| M00922       | Healthy   | 0.25      | 0.02 | 0.06 | 3.093 | 0.050   | CMP-Neu5Ac biosynthesis                                                                   |
| M00923       | Healthy   | 0.14      | 0.01 | 0.03 | 2.954 | 0.050   | UDP-L-FucNAc biosynthesis                                                                 |
| M00895       | Rota      | 0.73      | 0.82 | 0.02 | 2.881 | 0.050   | Thiamine biosynthesis, prokaryotes, AIR (+ DXP/glycine) => TMP/TPP                        |
| M00899       | Rota      | 0.74      | 0.92 | 0.03 | 3.095 | 0.050   | Thiamine salvage pathway, HMP/HET => TMP                                                  |
| Day + 1      |           |           |      |      |       |         |                                                                                           |
| M00061       | Healthy   | 0.56      | 0.17 | 0.08 | 3.337 | 0.050   | D-Glucuronate degradation, D-glucuronate => pyruvate + D-glyceraldehyde 3P                |
| M00133       | Healthy   | 0.34      | 0.10 | 0.03 | 3.223 | 0.050   | Polyamine biosynthesis, arginine => agmatine => putrescine => spermidine                  |
| M00135       | Healthy   | 0.26      | 0.05 | 0.06 | 3.098 | 0.050   | GABA biosynthesis, eukaryotes, putrescine => GABA                                         |
| M00308       | Healthy   | 0.94      | 0.74 | 0.04 | 3.092 | 0.050   | Semi-phosphorylative Entner-Doudoroff pathway, gluconate => glycerate-3P                  |
| M00345       | Healthy   | 0.83      | 0.58 | 0.07 | 3.208 | 0.050   | Formaldehyde assimilation, ribulose monophosphate pathway                                 |
| M00631       | Healthy   | 0.54      | 0.17 | 0.08 | 3.300 | 0.050   | D-Galacturonate degradation (bacteria), D-galacturonate => pyruvate + D-glyceraldehyde 3P |
| M00651       | Healthy   | 0.20      | 0.14 | 0.01 | 2.792 | 0.050   | Vancomycin resistance, D-Ala-D-Lac type                                                   |
| M00845       | Healthy   | 0.81      | 0.71 | 0.04 | 3.063 | 0.050   | Arginine biosynthesis, glutamate => acetylcitrulline => arginine                          |
| M00878       | Healthy   | 0.16      | 0.09 | 0.02 | 2.859 | 0.050   | Phenylacetate degradation, phenylacetate => acetyl-CoA/succinyl-CoA                       |
| M00892       | Healthy   | 0.91      | 0.53 | 0.14 | 3.315 | 0.050   | UDP-N-acetyl-D-glucosamine biosynthesis, eukaryotes, glucose => UDP-GlcNAc                |
| M00032       | Rota      | 0.15      | 0.19 | 0.01 | 3.022 | 0.050   | Lysine degradation, lysine => saccharopine => acetoacetyl-CoA                             |
| M00126       | Rota      | 0.61      | 0.75 | 0.03 | 3.053 | 0.050   | Tetrahydrofolate biosynthesis, GTP => THF                                                 |
| M00129       | Rota      | 0.34      | 0.47 | 0.04 | 3.000 | 0.050   | Ascorbate biosynthesis, animals, glucose-1P => ascorbate                                  |
| M00150       | Rota      | 0.23      | 0.62 | 0.09 | 3.363 | 0.050   | Fumarate reductase, prokaryotes                                                           |
| M00168       | Rota      | 0.33      | 0.63 | 0.11 | 3.219 | 0.050   | CAM (Crassulacean acid metabolism), dark                                                  |
| M00346       | Rota      | 0.66      | 0.74 | 0.03 | 2.849 | 0.050   | Formaldehyde assimilation, serine pathway                                                 |

|         |         |      |      |      |       |       |                                                                                 |
|---------|---------|------|------|------|-------|-------|---------------------------------------------------------------------------------|
| M00793  | Rota    | 0.93 | 1.25 | 0.09 | 3.174 | 0.050 | dTDP-L-rhamnose biosynthesis                                                    |
| M00840  | Rota    | 0.65 | 0.91 | 0.05 | 3.277 | 0.050 | Tetrahydrofolate biosynthesis, mediated by ribA and trpF, GTP => THF            |
| M00842  | Rota    | 0.59 | 0.84 | 0.04 | 3.186 | 0.050 | Tetrahydrobiopterin biosynthesis, GTP => BH4                                    |
| M00843  | Rota    | 0.59 | 0.84 | 0.04 | 3.186 | 0.050 | L-threo-Tetrahydrobiopterin biosynthesis, GTP => L-threo-BH4                    |
| M00899  | Rota    | 0.75 | 0.99 | 0.05 | 3.225 | 0.050 | Thiamine salvage pathway, HMP/HET => TMP                                        |
| M00913  | Rota    | 0.55 | 0.79 | 0.07 | 3.201 | 0.050 | Pantothenate biosynthesis, 2-oxoisovalerate/spermine => pantothenate            |
| Day + 7 |         |      |      |      |       |       |                                                                                 |
| M00017  | Healthy | 1.32 | 1.06 | 0.05 | 3.077 | 0.050 | Methionine biosynthesis, aspartate => homoserine => methionine                  |
| M00018  | Healthy | 1.25 | 1.08 | 0.04 | 2.792 | 0.050 | Threonine biosynthesis, aspartate => homoserine => threonine                    |
| M00029  | Healthy | 1.13 | 0.97 | 0.05 | 3.072 | 0.050 | Urea cycle                                                                      |
| M00526  | Healthy | 1.39 | 1.14 | 0.06 | 2.914 | 0.050 | Lysine biosynthesis, DAP dehydrogenase pathway, aspartate => lysine             |
| M00527  | Healthy | 1.39 | 1.14 | 0.06 | 3.026 | 0.050 | Lysine biosynthesis, DAP aminotransferase pathway, aspartate => lysine          |
| M00046  | Rota    | 0.08 | 0.13 | 0.01 | 3.073 | 0.050 | Pyrimidine degradation, uracil => beta-alanine, thymine => 3-aminoisobutanoate  |
| M00117  | Rota    | 0.92 | 1.03 | 0.04 | 2.817 | 0.050 | Ubiquinone biosynthesis, prokaryotes, chorismate (+ polyprenyl-PP) => ubiquinol |
| M00373  | Rota    | 0.46 | 0.62 | 0.04 | 2.603 | 0.050 | Ethylmalonyl pathway                                                            |
| M00530  | Rota    | 0.05 | 0.25 | 0.05 | 3.083 | 0.050 | Dissimilatory nitrate reduction, nitrate => ammonia                             |
| M00880  | Rota    | 0.05 | 0.18 | 0.02 | 3.031 | 0.050 | Molybdenum cofactor biosynthesis, GTP => molybdenum cofactor                    |
| M00899  | Rota    | 0.02 | 0.22 | 0.04 | 3.011 | 0.050 | Thiamine salvage pathway, HMP/HET => TMP                                        |
| M00913  | Rota    | 0.10 | 0.28 | 0.04 | 2.873 | 0.050 | Pantothenate biosynthesis, 2-oxoisovalerate/spermine => pantothenate            |

Day - 3, 3 days before rotavirus inoculation; Day + 1, 1 day post-inoculation; Day + 7, 7 days post-inoculation.

Healthy: non-diarrhea.

Rota: calves inoculated with rotavirus to induce diarrhea.

SEM: standard error of the mean.

KEGG: Kyoto Encyclopedia of Genes and Genomes; LDA: linear discriminant analysis; LEfSe: LDA effect size.
